# Supplementary material
Source: publisher site journal article supplement (https://www.spandidos-publications.com/3332/downloadSupplementary)
Supplement: Supplementary file 1 [file downloadSupplementary]

## Sheet: TargetScan7
Table SI. Relevant microRNAs predicted using the TargetScan online tool.
miRNA	Position in the UTR	seed match	context++ score	context++ score percentile	weighted context++ score	conserved branch length	Pct（%）
Conserved sites
hsa-miR-760	500-507	8mer	-0.5	98	-0.49	2.482	N/A
hsa-miR-199a-5p	533-539	7mer-1A	-0.25	93	-0.25	4.457	0.54
hsa-miR-199b-5p	533-539	7mer-1A	-0.25	93	-0.25	4.457	0.54
Poorly conserved sites
hsa-miR-4728-5p	17-23	7mer-m8	-0.19	85	-0.19	0	N/A
hsa-miR-6883-5p	17-23	7mer-m8	-0.17	84	-0.17	0	N/A
hsa-miR-6785-5p	17-23	7mer-m8	-0.15	82	-0.15	0	N/A
hsa-miR-149-3p	17-23	7mer-m8	-0.16	80	-0.16	0	N/A
hsa-miR-6825-5p	18-24	7mer-m8	-0.17	66	-0.17	0	N/A
hsa-miR-6889-5p	19-25	7mer-m8	-0.29	80	-0.29	0	N/A
hsa-miR-6777-5p	19-25	7mer-m8	-0.24	69	-0.24	0	N/A
hsa-miR-6781-5p	23-29	7mer-m8	-0.26	75	-0.26	0	N/A
hsa-miR-1203	30-36	7mer-m8	-0.25	84	-0.25	0.016	N/A
hsa-miR-5196-5p	42-48	7mer-1A	-0.08	59	-0.08	0	N/A
hsa-miR-4747-5p	42-48	7mer-1A	-0.06	56	-0.06	0	N/A
hsa-miR-204-3p	43-49	7mer-m8	-0.02	50	-0.02	0	N/A
hsa-miR-4646-5p	43-49	7mer-m8	-0.02	33	-0.02	0	N/A
hsa-miR-4505	45-51	7mer-m8	-0.09	64	-0.09	0	N/A
hsa-miR-5787	45-51	7mer-m8	-0.03	50	-0.03	0	N/A
hsa-miR-5001-5p	46-52	7mer-m8	-0.12	61	-0.12	0.016	N/A
hsa-miR-4498	46-52	7mer-m8	-0.09	56	-0.09	0.016	N/A
hsa-miR-4492	46-52	7mer-m8	-0.04	56	-0.04	0.016	N/A
hsa-miR-762	46-52	7mer-m8	-0.03	48	-0.03	0.016	N/A
hsa-miR-185-3p	47-53	7mer-m8	-0.14	60	-0.14	0.031	N/A
hsa-miR-4508	48-55	8mer	-0.53	98	-0.53	0	N/A
hsa-miR-6775-5p	49-55	7mer-1A	-0.26	80	-0.26	0	N/A
hsa-miR-5090	49-55	7mer-1A	-0.24	78	-0.24	0	N/A
hsa-miR-6727-5p	49-55	7mer-m8	-0.24	75	-0.24	0	N/A
hsa-miR-92a-1-5p	56-63	8mer	-0.41	97	-0.41	0	N/A
hsa-miR-29b-1-5p	59-65	7mer-1A	-0.02	43	-0.02	0	N/A
hsa-miR-1231	61-68	8mer	-0.45	99	-0.45	0	N/A
hsa-miR-632	62-68	7mer-1A	-0.08	83	-0.08	0.031	N/A
hsa-miR-4288	62-68	7mer-1A	-0.11	81	-0.11	0.031	N/A
hsa-miR-6769a-3p	72-78	7mer-m8	-0.22	96	-0.22	0	N/A
hsa-miR-7156-3p	75-81	7mer-m8	-0.23	92	-0.23	0	N/A
hsa-miR-1184	76-83	8mer	-0.34	98	-0.34	0.016	N/A
hsa-miR-3158-5p	77-83	7mer-1A	-0.13	88	-0.13	0.137	N/A
hsa-miR-17-3p	77-83	7mer-1A	-0.09	85	-0.09	0.467	N/A
hsa-miR-1205	77-83	7mer-1A	-0.09	80	-0.09	0.016	N/A
hsa-miR-6728-3p	79-85	7mer-1A	-0.1	82	-0.1	0	N/A
hsa-miR-593-3p	80-86	7mer-m8	-0.15	84	-0.15	0.016	N/A
hsa-miR-450a-5p	86-92	7mer-1A	-0.35	92	-0.35	0.973	N/A
hsa-miR-129-5p	87-94	8mer	-0.12	97	-0.12	0.244	< 0.1
hsa-miR-4445-5p	91-102	non-canonical	N/A	N/A	N/A	0	N/A
hsa-miR-4445-5p	91-102	non-canonical	N/A	N/A	N/A	0	N/A
hsa-miR-19b-1-5p	99-105	7mer-1A	-0.15	90	-0.14	0.031	N/A
hsa-miR-19b-2-5p	99-105	7mer-1A	-0.15	90	-0.14	0.031	N/A
hsa-miR-19a-5p	99-105	7mer-1A	-0.13	89	-0.13	0.031	N/A
hsa-miR-2052	99-105	7mer-1A	-0.13	86	-0.13	0	N/A
hsa-miR-4307	100-106	7mer-m8	-0.02	43	-0.02	0	N/A
hsa-miR-619-3p	101-112	non-canonical	N/A	N/A	N/A	0	N/A
hsa-miR-619-3p	101-112	non-canonical	N/A	N/A	N/A	0	N/A
hsa-miR-3138	106-112	7mer-m8	-0.29	90	-0.29	0	N/A
hsa-miR-8071	107-114	8mer	-0.61	99	-0.6	0	N/A
hsa-miR-3165	108-114	7mer-1A	-0.24	94	-0.24	0.016	N/A
hsa-miR-6880-5p	108-114	7mer-1A	-0.16	75	-0.16	0	N/A
hsa-miR-539-5p	119-125	7mer-1A	-0.05	88	-0.04	0.164	N/A
hsa-miR-4251	120-127	8mer	-0.22	96	-0.22	0	N/A
hsa-miR-4329	121-127	7mer-1A	-0.11	87	-0.11	0	N/A
hsa-miR-6761-5p	121-127	7mer-1A	-0.11	85	-0.11	0.223	N/A
hsa-miR-1247-3p	128-134	7mer-1A	-0.36	96	-0.36	0	N/A
hsa-miR-4532	128-134	7mer-1A	-0.24	87	-0.24	0	N/A
hsa-miR-7106-3p	131-137	7mer-1A	-0.11	66	-0.1	0	N/A
hsa-miR-6828-3p	133-139	7mer-m8	-0.09	75	-0.08	0	N/A
hsa-miR-767-3p	133-139	7mer-1A	-0.07	65	-0.07	0.031	N/A
hsa-miR-6728-3p	134-141	8mer	-0.1	82	-0.1	0	N/A
hsa-miR-6817-3p	136-142	7mer-m8	-0.02	38	-0.02	0	N/A
hsa-miR-4707-3p	142-148	7mer-1A	-0.17	46	-0.16	0	N/A
hsa-miR-4489	152-158	7mer-m8	-0.14	76	-0.14	0	N/A
hsa-miR-6846-5p	153-160	8mer	-0.43	96	-0.42	0	N/A
hsa-miR-6848-5p	153-160	8mer	-0.44	96	-0.43	0	N/A
hsa-miR-4488	154-160	7mer-1A	-0.31	93	-0.31	0	N/A
hsa-miR-1237-5p	154-160	7mer-1A	-0.29	92	-0.29	0	N/A
hsa-miR-4697-5p	154-160	7mer-1A	-0.27	90	-0.27	0	N/A
hsa-miR-637	155-161	7mer-m8	-0.14	77	-0.14	0.016	N/A
hsa-miR-4731-5p	156-162	7mer-m8	-0.13	79	-0.13	0	N/A
hsa-miR-4505	157-163	7mer-m8	-0.13	74	-0.13	0	N/A
hsa-miR-5787	157-163	7mer-m8	-0.07	70	-0.07	0	N/A
hsa-miR-513a-5p	166-172	7mer-1A	-0.04	64	-0.04	0.043	N/A
hsa-miR-27a-3p	166-172	7mer-1A	-0.03	57	-0.03	0.477	< 0.1
hsa-miR-27b-3p	166-172	7mer-1A	-0.03	56	-0.03	0.477	< 0.1
hsa-miR-6837-3p	168-174	7mer-1A	-0.07	67	-0.07	0	N/A
hsa-miR-6754-3p	168-174	7mer-1A	-0.04	60	-0.04	0.016	N/A
hsa-miR-412-3p	168-174	7mer-1A	-0.03	49	-0.03	0.016	N/A
hsa-miR-6515-3p	169-175	7mer-m8	-0.02	32	-0.02	0	N/A
hsa-miR-6812-3p	171-177	7mer-m8	-0.22	83	-0.22	0	N/A
hsa-miR-191-3p	174-180	7mer-m8	-0.19	86	-0.19	0	N/A
hsa-miR-1539	175-181	7mer-m8	-0.46	97	-0.46	0	N/A
hsa-miR-548at-5p	182-189	8mer	-0.03	66	-0.03	0	N/A
hsa-miR-561-3p	183-189	7mer-1A	-0.01	41	-0.01	0	N/A
hsa-miR-4467	193-199	7mer-m8	-0.52	98	-0.52	0	N/A
hsa-miR-3180	195-201	7mer-m8	-0.37	86	-0.36	0.159	N/A
hsa-miR-3180-3p	195-201	7mer-m8	-0.37	86	-0.36	0.159	N/A
hsa-miR-6816-5p	195-201	7mer-m8	-0.36	83	-0.35	0.159	N/A
hsa-miR-3196	195-201	7mer-m8	-0.32	79	-0.32	0.159	N/A
hsa-miR-4713-3p	209-216	8mer	-0.33	92	-0.33	0	N/A
hsa-miR-638	210-216	7mer-1A	-0.19	84	-0.19	0.031	N/A
hsa-miR-769-3p	210-216	7mer-m8	-0.08	81	-0.08	0.043	N/A
hsa-miR-450b-3p	210-216	7mer-m8	-0.05	73	-0.05	0.043	N/A
hsa-miR-619-5p	211-217	7mer-m8	-0.02	56	-0.02	0	N/A
hsa-miR-6506-5p	211-217	7mer-m8	-0.02	45	-0.02	0	N/A
hsa-miR-1343-3p	213-220	8mer	-0.23	93	-0.23	0	N/A
hsa-miR-6783-3p	213-220	8mer	-0.22	92	-0.22	0	N/A
hsa-miR-6742-3p	213-219	7mer-1A	-0.09	82	-0.09	0	N/A
hsa-miR-6852-5p	213-219	7mer-1A	-0.09	74	-0.09	0	N/A
hsa-miR-939-3p	213-219	7mer-1A	-0.01	37	-0.01	0	N/A
hsa-miR-3074-5p	215-221	7mer-1A	-0.01	46	-0.01	0	N/A
hsa-miR-7152-5p	215-221	7mer-1A	-0.01	35	-0.01	0	N/A
hsa-miR-193b-5p	219-225	7mer-m8	-0.09	58	-0.09	0.031	N/A
hsa-miR-5194	221-227	7mer-m8	-0.24	93	-0.24	0	N/A
hsa-miR-1914-3p	221-227	7mer-m8	-0.16	91	-0.16	0	N/A
hsa-miR-6738-5p	221-227	7mer-m8	-0.17	84	-0.17	0	N/A
hsa-miR-6515-5p	223-230	8mer	-0.34	96	-0.34	0	N/A
hsa-miR-1249-5p	223-229	7mer-1A	-0.18	82	-0.18	0.031	N/A
hsa-miR-6797-5p	223-229	7mer-1A	-0.17	80	-0.17	0.031	N/A
hsa-miR-4443	224-230	7mer-1A	-0.06	66	-0.06	0	N/A
hsa-miR-6832-3p	229-235	7mer-1A	-0.05	62	-0.04	0	N/A
hsa-miR-211-5p	229-235	7mer-m8	-0.02	41	-0.02	0.92	< 0.1
hsa-miR-204-5p	229-235	7mer-m8	-0.02	41	-0.02	0.92	< 0.1
hsa-miR-604	236-242	7mer-m8	-0.22	93	-0.22	0.016	N/A
hsa-miR-6829-5p	237-244	8mer	-0.38	98	-0.37	0	N/A
hsa-miR-3620-5p	238-245	8mer	-0.25	96	-0.25	0	N/A
hsa-miR-1587	238-245	8mer	-0.32	96	-0.32	0	N/A
hsa-miR-4656	238-244	7mer-1A	-0.18	86	-0.18	0.223	N/A
hsa-miR-4741	238-244	7mer-1A	-0.15	86	-0.14	0	N/A
hsa-miR-4675	238-244	7mer-1A	-0.06	76	-0.06	0	N/A
hsa-miR-5001-5p	238-244	7mer-1A	-0.14	67	-0.13	0.25	N/A
hsa-miR-762	238-244	7mer-1A	-0.08	66	-0.08	0.25	N/A
hsa-miR-4492	238-244	7mer-1A	-0.06	62	-0.06	0.25	N/A
hsa-miR-4498	238-244	7mer-1A	-0.09	54	-0.09	0.25	N/A
hsa-miR-4674	239-245	7mer-1A	-0.06	66	-0.06	0	N/A
hsa-miR-3147	240-247	8mer	-0.42	98	-0.41	0	N/A
hsa-miR-4425	241-247	7mer-1A	-0.17	73	-0.17	0	N/A
hsa-miR-1250-3p	247-253	7mer-1A	-0.01	46	-0.01	0	N/A
hsa-miR-153-5p	247-253	7mer-1A	-0.01	33	-0.01	0.031	N/A
hsa-miR-3156-5p	259-265	7mer-1A	-0.12	85	-0.12	0	N/A
hsa-miR-3658	261-267	7mer-1A	-0.09	88	-0.09	0	N/A
hsa-miR-7856-5p	262-268	7mer-1A	-0.01	40	-0.01	0	N/A
hsa-miR-1290	265-271	7mer-m8	-0.13	85	-0.13	0.016	N/A
hsa-miR-4450	267-273	7mer-m8	-0.28	92	-0.28	0	N/A
hsa-miR-5010-5p	268-274	7mer-m8	-0.31	95	-0.31	0	N/A
hsa-miR-4525	268-274	7mer-m8	-0.25	95	-0.24	0	N/A
hsa-miR-4716-3p	269-275	7mer-m8	-0.29	90	-0.29	0.031	N/A
hsa-miR-6794-5p	269-275	7mer-m8	-0.27	88	-0.26	0.031	N/A
hsa-miR-6785-5p	272-278	7mer-m8	-0.25	93	-0.25	0	N/A
hsa-miR-6883-5p	272-278	7mer-m8	-0.22	91	-0.22	0	N/A
hsa-miR-4728-5p	272-278	7mer-m8	-0.22	89	-0.22	0	N/A
hsa-miR-149-3p	272-278	7mer-m8	-0.2	87	-0.19	0	N/A
hsa-miR-6825-5p	273-279	7mer-m8	-0.27	85	-0.27	0	N/A
hsa-miR-6783-5p	275-281	7mer-1A	-0.13	77	-0.13	0	N/A
hsa-miR-6824-5p	275-281	7mer-m8	-0.18	76	-0.18	0	N/A
hsa-miR-6504-3p	289-300	non-canonical	N/A	N/A	N/A	0	N/A
hsa-miR-6504-3p	289-300	non-canonical	N/A	N/A	N/A	0	N/A
hsa-miR-3934-3p	306-312	7mer-m8	-0.27	95	-0.27	0	N/A
hsa-miR-6854-5p	307-313	7mer-m8	-0.17	90	-0.17	0	N/A
hsa-miR-488-3p	312-318	7mer-1A	-0.03	65	-0.03	0.08	N/A
hsa-miR-510-3p	313-319	7mer-1A	-0.01	43	-0.01	0	N/A
hsa-miR-133b	331-338	8mer	-0.47	97	-0.46	1.755	< 0.1
hsa-miR-133a-3p.2	331-338	8mer	-0.47	97	-0.46	1.755	< 0.1
hsa-miR-133a-3p.1	331-337	7mer-1A	-0.26	87	-0.26	3.118	0.57
hsa-miR-5002-5p	333-339	7mer-m8	-0.02	45	-0.02	0	N/A
hsa-miR-5089-5p	337-343	7mer-m8	-0.07	89	-0.07	0	N/A
hsa-miR-6871-5p	339-345	7mer-1A	-0.16	82	-0.16	0	N/A
hsa-miR-4283	348-354	7mer-m8	-0.31	94	-0.31	0	N/A
hsa-miR-6085	349-356	8mer	-0.46	99	-0.46	0	N/A
hsa-miR-6813-5p	349-356	8mer	-0.45	99	-0.44	0	N/A
hsa-miR-6743-5p	350-356	7mer-1A	-0.29	94	-0.29	0	N/A
hsa-miR-6789-5p	350-356	7mer-m8	-0.3	93	-0.29	0	N/A
hsa-miR-4688	350-356	7mer-1A	-0.26	92	-0.26	0	N/A
hsa-miR-224-5p	357-363	7mer-m8	-0.18	93	-0.18	0.062	N/A
hsa-miR-5195-5p	368-374	7mer-m8	-0.03	12	-0.03	0	N/A
hsa-miR-6846-3p	369-375	7mer-m8	-0.08	62	-0.08	0	N/A
hsa-miR-3144-5p	372-379	8mer	-0.31	93	-0.31	0	N/A
hsa-miR-6810-5p	373-379	7mer-m8	-0.03	51	-0.03	0	N/A
hsa-miR-4652-5p	373-379	7mer-1A	-0.07	47	-0.07	0	N/A
hsa-miR-3191-3p	373-379	7mer-1A	-0.05	37	-0.04	0	N/A
hsa-miR-6890-5p	375-381	7mer-1A	-0.06	52	-0.06	0	N/A
hsa-miR-3675-5p	375-381	7mer-1A	-0.01	19	-0.01	0	N/A
hsa-miR-6859-3p	389-395	7mer-m8	-0.36	95	-0.36	0	N/A
hsa-miR-3976	394-401	8mer	-0.16	82	-0.16	0	N/A
hsa-miR-656-3p	403-410	8mer	-0.05	86	-0.05	0.016	N/A
hsa-miR-8485	416-423	8mer	-0.29	97	-0.29	0	N/A
hsa-miR-3941	417-424	8mer	-0.32	98	-0.31	0	N/A
hsa-miR-603	417-423	7mer-1A	-0.15	94	-0.14	0.031	N/A
hsa-miR-329-3p	417-423	7mer-1A	-0.12	92	-0.12	1.453	N/A
hsa-miR-362-3p	417-423	7mer-1A	-0.12	92	-0.12	1.453	N/A
hsa-miR-466	418-424	7mer-1A	-0.13	89	-0.13	0	N/A
hsa-miR-4672	418-424	7mer-1A	-0.13	87	-0.13	0	N/A
hsa-miR-4282	423-429	7mer-1A	-0.01	49	-0.01	0	N/A
hsa-miR-539-5p	431-437	7mer-m8	-0.07	92	-0.07	0.244	N/A
hsa-miR-4531	433-440	8mer	-0.37	98	-0.36	0	N/A
hsa-miR-4434	433-439	7mer-1A	-0.17	90	-0.17	0	N/A
hsa-miR-5703	433-439	7mer-1A	-0.17	89	-0.17	0	N/A
hsa-miR-4516	433-439	7mer-1A	-0.07	84	-0.07	0	N/A
hsa-miR-1270	434-440	7mer-1A	-0.19	93	-0.19	0	N/A
hsa-miR-620	434-440	7mer-1A	-0.19	93	-0.19	0	N/A
hsa-miR-3120-3p	444-450	7mer-1A	-0.17	91	-0.17	0.159	N/A
hsa-let-7g-3p	446-453	8mer	-0.27	97	-0.27	0.031	N/A
hsa-let-7a-2-3p	446-453	8mer	-0.26	97	-0.26	0.031	N/A
hsa-let-7c-3p	447-453	7mer-1A	-0.08	74	-0.08	0.031	N/A
hsa-miR-493-5p	447-453	7mer-1A	-0.02	55	-0.02	1.427	N/A
hsa-miR-524-5p	463-469	7mer-1A	-0.02	74	-0.02	0	N/A
hsa-miR-520d-5p	463-469	7mer-1A	-0.01	52	-0.01	0	N/A
hsa-miR-3920	467-473	7mer-m8	-0.06	63	-0.06	0	N/A
hsa-miR-4293	470-477	8mer	-0.52	99	-0.52	0	N/A
hsa-miR-596	471-477	7mer-1A	-0.21	95	-0.21	0.17	N/A
hsa-miR-3065-5p	479-485	7mer-m8	-0.17	93	-0.17	0	N/A
hsa-miR-3529-3p	480-486	7mer-m8	-0.15	90	-0.15	0	N/A
hsa-miR-3529-3p	483-489	7mer-m8	-0.14	90	-0.14	0	N/A
hsa-miR-3529-3p	486-492	7mer-m8	-0.14	89	-0.14	0	N/A
hsa-miR-3529-3p	489-495	7mer-m8	-0.13	87	-0.13	0	N/A
hsa-miR-3529-3p	492-498	7mer-m8	-0.13	86	-0.12	0	N/A
hsa-miR-4539	497-503	7mer-1A	-0.05	76	-0.05	0.137	N/A
hsa-miR-146a-3p	498-504	7mer-m8	-0.1	75	-0.1	0	N/A
hsa-miR-8057	501-507	7mer-m8	-0.21	96	-0.21	0.483	N/A
hsa-miR-6822-3p	501-507	7mer-1A	-0.22	90	-0.21	0	N/A
hsa-miR-5197-5p	504-510	7mer-1A	-0.21	91	-0.21	0	N/A
hsa-miR-656-3p	509-515	7mer-1A	-0.04	82	-0.03	0.187	N/A
hsa-miR-656-3p	513-519	7mer-m8	-0.1	93	-0.1	0.187	N/A
hsa-miR-4680-5p	528-534	7mer-1A	-0.15	86	-0.15	0.159	N/A
hsa-miR-1825	533-539	7mer-1A	-0.13	85	-0.13	0.016	N/A
hsa-miR-5586-5p	535-541	7mer-1A	-0.13	83	-0.13	0	N/A
hsa-miR-5582-3p	541-547	7mer-m8	-0.02	65	-0.02	0	N/A
hsa-miR-548aq-3p	542-548	7mer-m8	-0.02	67	-0.02	0	N/A
hsa-miR-548ae-3p	542-548	7mer-m8	-0.02	67	-0.02	0	N/A
hsa-miR-548j-3p	542-548	7mer-m8	-0.02	67	-0.02	0	N/A
hsa-miR-548ah-3p	542-548	7mer-m8	-0.02	67	-0.02	0	N/A
hsa-miR-548x-3p	542-548	7mer-m8	-0.02	67	-0.02	0	N/A
hsa-miR-548aj-3p	542-548	7mer-m8	-0.02	67	-0.02	0	N/A
hsa-miR-548am-3p	542-548	7mer-m8	-0.02	67	-0.02	0	N/A
hsa-miR-31-5p	551-557	7mer-m8	-0.21	85	-0.2	1.707	0.19
hsa-miR-3147	555-561	7mer-m8	-0.28	96	-0.27	0	N/A
hsa-miR-92a-1-5p	556-563	8mer	-0.5	98	-0.48	0	N/A
hsa-miR-758-5p	558-564	7mer-m8	-0.16	94	-0.16	0	N/A
hsa-miR-224-3p	560-566	7mer-m8	-0.08	86	-0.08	0.016	N/A
hsa-miR-522-3p	560-566	7mer-m8	-0.08	85	-0.08	0.016	N/A
hsa-miR-5680	562-569	8mer	-0.03	87	-0.03	0	N/A
hsa-miR-548au-3p	569-576	8mer	-0.48	98	-0.47	0	N/A
hsa-miR-34a-5p	570-576	7mer-1A	-0.24	85	-0.24	1.55	< 0.1
hsa-miR-449b-5p	570-576	7mer-1A	-0.24	84	-0.24	1.55	< 0.1
hsa-miR-449a	570-576	7mer-1A	-0.22	82	-0.21	1.55	< 0.1
hsa-miR-34c-5p	570-576	7mer-1A	-0.22	80	-0.21	1.55	< 0.1
hsa-miR-7150	571-577	7mer-1A	-0.23	91	-0.22	0	N/A
hsa-miR-182-5p	572-578	7mer-1A	-0.22	89	-0.21	2.027	< 0.1
hsa-miR-1271-5p	572-578	7mer-1A	-0.11	75	-0.1	2.027	< 0.1
hsa-miR-96-5p	572-578	7mer-1A	-0.09	72	-0.08	2.027	< 0.1
hsa-miR-4452	581-588	8mer	-0.24	98	-0.23	0	N/A
hsa-miR-183-3p	582-588	7mer-1A	-0.09	94	-0.09	0.239	N/A
hsa-miR-4635	584-590	7mer-1A	-0.09	87	-0.08	0	N/A
hsa-miR-526b-5p	585-591	7mer-1A	-0.12	81	-0.12	0.043	N/A
hsa-miR-578	586-592	7mer-1A	-0.06	75	-0.05	0.239	N/A
hsa-miR-548as-3p	600-606	7mer-m8	-0.08	86	-0.08	0	N/A
hsa-miR-4261	606-612	7mer-m8	-0.15	85	-0.14	0	N/A
hsa-miR-4496	607-613	7mer-m8	-0.03	89	-0.03	0	N/A
hsa-miR-4700-3p	610-616	7mer-1A	-0.11	85	-0.11	0	N/A
hsa-let-7g-3p	612-619	8mer	-0.32	98	-0.31	0.031	N/A
hsa-let-7a-2-3p	612-619	8mer	-0.31	98	-0.3	0.031	N/A
hsa-let-7c-3p	613-619	7mer-1A	-0.1	81	-0.1	0.031	N/A
hsa-miR-493-5p	613-619	7mer-1A	-0.02	45	-0.02	1.406	N/A
hsa-miR-1285-5p	623-629	7mer-1A	-0.08	90	-0.08	0	N/A
hsa-miR-6083	626-632	7mer-m8	-0.1	96	-0.1	0	N/A
hsa-miR-186-5p	632-638	7mer-m8	-0.04	92	-0.04	1.312	N/A
hsa-miR-3148	636-642	7mer-m8	-0.03	67	-0.03	0	N/A
hsa-miR-4668-5p	637-644	8mer	-0.28	97	-0.27	0.159	N/A
hsa-miR-6739-5p	638-644	7mer-1A	-0.16	89	-0.15	0	N/A
hsa-miR-3153	638-644	7mer-1A	-0.09	87	-0.09	0	N/A
hsa-miR-6733-5p	638-644	7mer-1A	-0.12	85	-0.12	0	N/A
hsa-miR-2052	659-665	7mer-1A	-0.14	89	-0.14	0	N/A
hsa-miR-19a-5p	659-665	7mer-1A	-0.1	84	-0.1	0.276	N/A
hsa-miR-19b-2-5p	659-665	7mer-1A	-0.06	76	-0.06	0.276	N/A
hsa-miR-19b-1-5p	659-665	7mer-1A	-0.06	76	-0.06	0.276	N/A
hsa-miR-578	663-670	8mer	-0.32	98	-0.31	0.239	N/A
hsa-miR-944	670-676	7mer-m8	-0.02	56	-0.02	0.043	N/A
hsa-miR-3613-3p	680-686	7mer-m8	-0.02	36	-0.02	0	N/A
hsa-miR-3065-5p	683-689	7mer-m8	-0.04	53	-0.04	0.26	N/A
hsa-miR-5092	690-696	7mer-1A	-0.16	88	-0.16	0	N/A
hsa-miR-6505-3p	698-705	8mer	-0.43	98	-0.41	0.031	N/A
hsa-miR-617	699-705	7mer-1A	-0.13	76	-0.12	0.17	N/A
hsa-miR-2115-3p	710-716	7mer-1A	-0.16	89	-0.15	0.575	N/A
hsa-miR-361-5p	710-716	7mer-m8	-0.14	82	-0.14	2.042	N/A
hsa-miR-548l	714-720	7mer-m8	-0.02	72	-0.02	0.016	N/A
hsa-miR-548n	715-721	7mer-m8	-0.02	70	-0.02	0.043	N/A
hsa-miR-5692a	721-727	7mer-1A	-0.01	56	-0.01	0	N/A
hsa-miR-216b-3p	730-737	8mer	-0.35	98	-0.34	0	N/A
hsa-miR-6884-3p	734-740	7mer-m8	-0.29	96	-0.28	0	N/A
hsa-miR-548ap-3p	738-744	7mer-m8	-0.12	91	-0.11	0.031	N/A
hsa-miR-548aa	738-744	7mer-m8	-0.12	90	-0.11	0.031	N/A
hsa-miR-548t-3p	738-744	7mer-m8	-0.12	90	-0.11	0.031	N/A
hsa-miR-4666a-3p	743-749	7mer-1A	-0.09	91	-0.08	0	N/A
hsa-miR-300	743-749	7mer-1A	-0.06	87	-0.06	2.287	N/A
hsa-miR-381-3p	743-749	7mer-1A	-0.03	79	-0.03	2.287	N/A
hsa-miR-98-3p	743-749	7mer-m8	-0.06	75	-0.06	0.652	N/A
hsa-let-7a-3p	743-749	7mer-m8	-0.04	65	-0.04	0.652	N/A
hsa-let-7b-3p	743-749	7mer-m8	-0.03	56	-0.03	0.652	N/A
hsa-let-7f-1-3p	743-749	7mer-m8	-0.03	54	-0.03	0.652	N/A
hsa-miR-1284	744-750	7mer-m8	-0.19	85	-0.19	0.016	N/A
hsa-miR-625-3p	746-752	7mer-1A	-0.07	86	-0.07	0	N/A
hsa-miR-6745	756-762	7mer-m8	-0.26	93	-0.25	0.031	N/A
hsa-miR-363-5p	756-762	7mer-m8	-0.26	92	-0.25	0.031	N/A
hsa-miR-6823-5p	759-765	7mer-1A	-0.08	72	-0.08	0	N/A
hsa-miR-4518	760-766	7mer-m8	-0.24	97	-0.23	0.016	N/A
hsa-miR-1266-5p	760-766	7mer-m8	-0.29	97	-0.28	0.016	N/A
hsa-miR-510-5p	761-768	8mer	-0.42	99	-0.41	0	N/A
hsa-miR-512-5p	762-768	7mer-1A	-0.07	76	-0.07	0.031	N/A
hsa-miR-651-5p	770-776	7mer-1A	-0.12	85	-0.12	0.016	N/A
hsa-miR-208a-5p	790-796	7mer-m8	-0.17	97	-0.16	0	N/A
hsa-miR-208b-5p	790-796	7mer-m8	-0.22	96	-0.21	0	N/A
hsa-miR-100-3p	792-798	7mer-1A	-0.16	91	-0.16	0	N/A
hsa-miR-4503	794-800	7mer-1A	-0.19	88	-0.18	0	N/A
hsa-miR-7856-5p	795-801	7mer-1A	-0.01	40	-0.01	0	N/A
hsa-miR-4670-3p	806-813	8mer	-0.29	98	-0.29	0	N/A
hsa-miR-1245b-3p	811-817	7mer-m8	-0.26	97	-0.25	0	N/A
hsa-miR-5683	812-818	7mer-m8	-0.22	95	-0.21	0	N/A
hsa-miR-641	822-828	7mer-1A	-0.14	94	-0.14	0.016	N/A
hsa-miR-3617-5p	822-828	7mer-1A	-0.13	92	-0.12	0.016	N/A
hsa-miR-548ao-3p	832-838	7mer-1A	-0.26	97	-0.26	0	N/A
hsa-miR-3667-5p	832-838	7mer-1A	-0.18	90	-0.18	0	N/A
hsa-miR-208b-3p	833-839	7mer-1A	-0.23	95	-0.22	2.459	0.4
hsa-miR-208a-3p	833-839	7mer-1A	-0.22	94	-0.21	2.459	0.4
hsa-miR-499a-5p	833-839	7mer-1A	-0.14	84	-0.13	2.459	0.4
hsa-miR-548ba	849-856	8mer	-0.37	99	-0.36	0	N/A
hsa-miR-570-5p	849-856	8mer	-0.34	98	-0.33	0	N/A
hsa-miR-548ai	849-856	8mer	-0.34	98	-0.33	0	N/A
hsa-miR-548ag	849-856	8mer	-0.34	98	-0.33	0	N/A
hsa-miR-7856-5p	852-859	8mer	-0.27	99	-0.27	0	N/A
hsa-miR-4477b	852-858	7mer-1A	-0.22	93	-0.21	0	N/A
hsa-miR-629-5p	860-867	8mer	-0.46	99	-0.45	0	N/A
hsa-miR-6839-3p	861-867	7mer-m8	-0.29	95	-0.28	0	N/A
hsa-miR-6721-5p	879-885	7mer-1A	-0.19	84	0	0.159	N/A
hsa-miR-6760-3p	893-899	7mer-m8	-0.24	95	0	0	N/A
